# Supplementary material
Source: PubMed Central journal article supplement (PMC7292784)

# THE LANCET

## Respiratory Medicine

### Supplementary appendix

This appendix formed part of the original submission and has been peer reviewed. We post it as supplied by the authors.

Supplement to: Verleden SE, Tanabe N, McDonough JE, et al. Small airways pathology in idiopathic pulmonary fibrosis: a retrospective cohort study. *Lancet Respir Med* 2020; published online Feb 13. [https://doi.org/10.1016/S2213-2600\(19\)30356-X](https://doi.org/10.1016/S2213-2600(19)30356-X).

## Online supplement

### Small airways pathology in Idiopathic Pulmonary Fibrosis: A case-control study

Stijn E. Verleden Ph.D.\* , Naoya Tanabe M.D.\* , John E. McDonough Ph.D., Dragoş M. Vasilescu Ph.D., Feng Xu Ph.D., Wim A. Wuyts M.D., Davide Piloni M.D., Stijn Willems Ph.D., Cindy Mai M.D., Jeroen Hostens Ph.D., Joel D. Cooper M.D., Erik K. Verbeken M.D., Johnny Verschakelen M.D., Craig J. Galban Ph.D., Dirk E. Van Raemdonck M.D., Thomas V. Colby M.D., Marc Decramer M.D., Geert M. Verleden M.D., Naftali Kaminski M.D., Tillie-Louise Hackett Ph.D., Bart M. Vanaudenaerde Ph.D.\* , James C. Hogg M.D.\*

From the Department of Clinical and Experimental Medicine, Division of Respiratory diseases, (S.E.V., J.E.M., Prof. W.A.W., D.P., S.W., E.K.V., D.E.V.R., M.D., G.M.V., B.M.V.); Department of Radiology, (C.M., J.V.) - all KU Leuven - University of Leuven, University Hospitals Leuven, B-3000 Leuven, Belgium; the University of British Columbia, Department of Pathology and Center for Heart and Lung Innovation, located at St. Paul's Hospital, Vancouver, British Columbia, Canada (N.T., D.M.V., F.X., T.-L.H., Prof. J.C.H.); Department of Respiratory Medicine, Graduate School of Medicine, Kyoto University, Kyoto, Japan (N.T.); the Respiratory Disease Unit, Fondazione IRCCS Policlinico San Matteo, University of Pavia, Pavia, Italy (D.P.); the Bruker microCT, Kontich, Belgium (J.H.); the Department of Thoracic Surgery University of Pennsylvania, Philadelphia, PA, USA (Prof. J.D.C.); the Department of Radiology, University of Michigan, Ann Arbor, Michigan (C.J.G.); the Section of Pulmonary, Critical care and Sleep Medicine, Yale University, New Haven, Connecticut (Prof. N.K.); the Department of Laboratory Medicine and Pathology, Mayo Clinic Arizona (Prof. T.V.C.).

\* contributed equally to this work.

#### Contents

- ✓ **Table S1. List of antibodies for immunohistochemistry**
- ✓ **Figure S1. Variability in MDCT counting**
- ✓ **Figure S2. Variability in terminal bronchioles counting**

**TableS1. List of antibodies for immunohistochemistry**

| <b>Target</b>     | <b>Antibody name</b> | <b>Supplier</b> | <b>Product ID</b> | <b>Dilution</b> |
|-------------------|----------------------|-----------------|-------------------|-----------------|
| <b>CD8 cell</b>   | CD8                  | DAKO            | M7103             | 1:400           |
| <b>CD4 cell</b>   | CD4                  | DAKO            | M7310             | 1:200           |
| <b>Neutrophil</b> | Neutrophil elastase  | DAKO            | M0752             | 1:6400          |
| <b>B cell</b>     | CD79 $\alpha$        | DAKO            | M7050             | 1:150           |
| <b>Macrophage</b> | CD68                 | DAKO            | M0718             | 1400            |
| <b>Eosinophil</b> | Major Basic Protein  | Millipore       | CBL4419           | 1:100           |



**Figure S2. Variability in terminal bronchioles counting**

Comparison of the number of terminal bronchioles counted by 2 different observers using the same microCT images. The Bland and Altman plots show good agreement between the two observers with negligible bias and a relatively tight 95% confidence interval.

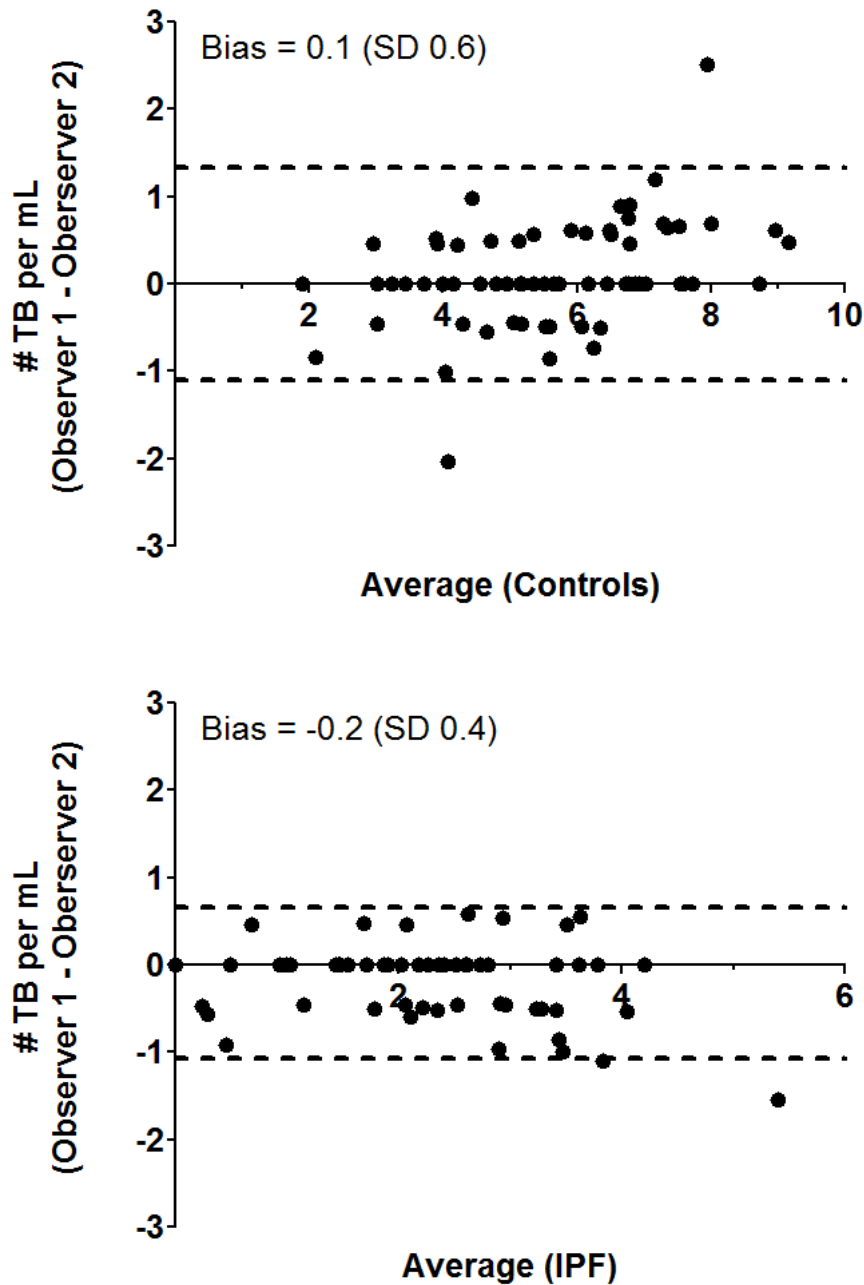

**Figure S3. Comparison of terminal bronchiole counts by smoking status**

Comparison of the number of terminal bronchioles in control and IPF patients sub-divided by pack years of smoking. A Kruskal-Wallis test with a Dunn's post test was used to test for significant differences. Data shows that similar numbers of terminal bronchioles are lost in IPF patients with both low and high pack years of smoking, compared to controls with and without smoking history.

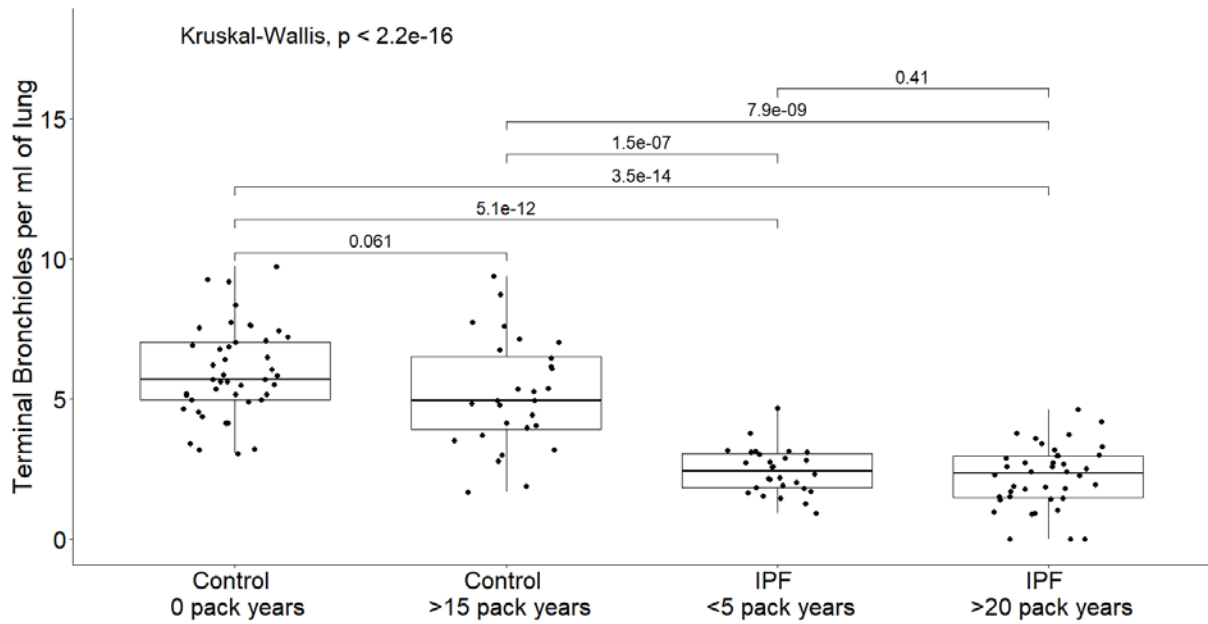

Supplement: NIHMS1563047-supplement-1.pdf [file NIHMS1563047-supplement-1.pdf]
